# Supplementary material for: Generation and Characterization of ALX-0171, a Potent Novel Therapeutic Nanobody for the Treatment of Respiratory Syncytial Virus Infection
Source: PubMed Central journal article supplement — Antimicrob Agents Chemother. 2015 Dec 31;60(1):6–13. doi: 10.1128/AAC.01802-15 (PMC4704182; doi:10.1128/aac.01802-15), 2015-12-31
Supplement: AAC.01802-15_zac012154654so1.pdf [file AAC.01802-15_zac012154654so1.pdf]

# Supplemental information

## SI Materials and Methods

**Generation of Nanobodies** A *Pichia pastoris* expression system was developed, based on the commercially available pPICZαA system from Invitrogen, using X-33 as a host strain, the AOX1 promoter controlling the expression and the alpha mating factor secretion peptide for secretion of the Nanobody into the medium (Figure S1). After transformation the clones were selected on zeocin-containing plates, streaked on a new zeocin-containing plate and a qPCR was performed to rank the clones according to their copy numbers. Single colonies were generated from a single clone with high copy number. A research cell bank was generated using only non-animal derived raw materials

**Microneutralisation assay.** HEp-2 cells (ATCC) were maintained in Dulbecco's Modified Eagle's Medium (DMEM) supplemented with 10% foetal bovine serum (FBS, Sigma) and 1% penicillin/streptomycin (Invitrogen). They were kept at sub-confluent growth conditions until the start of the assay. On the day before the assay HEp-2 cells were seeded in 96 well culture plates at a density of 22,500 cells/well and kept overnight at 37°C in a 5% CO<sub>2</sub> incubator. On the day of the assay RSV-Long (ATCC VR-26™) or RSV-B 18537 (ATCC VR-1580™) (0.05-0.15 MOI) was pre-incubated 30 min with various concentrations of ALX-0171 or palivizumab. The mixtures were then overlaid on the HEp-2 cells and incubated for 1 h at 37°C following which 100 µL of DMEM assay medium was added to each well to give a total volume of 150 µL. Subsequently, the HEp-2 cells were incubated for 72 h at 37°C in a 5% CO<sub>2</sub> incubator, washed twice with D-PBS and fixed with cold 80% acetone for 20 min at 4°C. After blocking with D-PBS containing 2% BSA, the viral F-protein was detected using an

anti-F-protein monoclonal antibody (Synagis®, Abbott) followed by horse-radish peroxidase-labelled Goat anti-human IgG Fcγ-specific monoclonal antibody. Colorimetric revelation was performed using sTMB (SDT-reagents) and stopped after 10 min with 1N HCl. The F protein was then indirectly quantified by measuring the absorbance at 450 nm with a reference wavelength at 620 nm. The IC<sub>50</sub> values were calculated from the dose-response curves using a 4 parameter logistic nonlinear regression model with GraphPad Prism 5 software.

**Viral neutralisation assay.** Serial 3-fold dilutions of ALX-0171 or palivizumab were prepared in triplicate in Dulbecco's MEM with 1% foetal bovine serum (Gibco, UK) and were added to 96-well flat-bottomed tissue culture plates (Nunc). Approximately 100 TCID<sub>50</sub> of RSV-A or -B in 50 µL of medium was added to each well, and plates were incubated at 37°C for 1 h in a 5% CO<sub>2</sub> incubator after which 10<sup>4</sup> HEp-2 cells (kindly provided by Ralph Tripp, University of Georgia, USA) were added to each well. After incubation for 6–8 days at 37°C, cytopathic effect was recorded for each well and the VN<sub>50</sub> titers were calculated using the Reed and Muench method [1].

**Plaque reduction assay for clinical isolate testing.** A semi-quantitative plaque assay in a 24-well plate with complete HEp-2 cell monolayer was used to calculate the neutralization capacity of ALX-0171 and palivizumab at 40 µg/mL against the RSV isolates. The 24-well plates were seeded with 20 x 10<sup>4</sup> HEp-2 cells/mL 1 to 2 days prior to the assay and used when a complete monolayer had formed. Briefly, the RSV working pool was diluted to generate a virus concentration of approximately 10<sup>5</sup> PFU/mL. RSV working pools with concentrations of less than 10<sup>5</sup> PFU/mL were tested neat without further dilution. ALX-0171 and palivizumab were diluted in MEM to make a final concentration of 40 µg/mL. One mL (10<sup>5</sup> PFU) of virus was mixed with an equal volume of MEM, ALX-0171 or palivizumab so that three different virus-antibody mixtures were generated; virus-only (RSV & MEM), virus + ALX-0171 and virus + palivizumab (reference). These virus-antibody mixtures were incubated at 36°C at 5%

CO<sub>2</sub> for 1 h to allow neutralisation of virus to occur. In order to determine the reduction in viral infectivity that occurred during the incubation period, serial ten-fold dilutions of the virus-antibody mixtures were made in MEM. Undiluted, 10<sup>-1</sup>, 10<sup>-2</sup> and 10<sup>-3</sup> dilutions were dispensed in duplicate into a 24-well plate with a complete HEp-2 cell monolayer. Infectious virus in the virus-antibody mixture would be able to attach and infect the HEp-2 cells during the subsequent 2 hour incubation onto the cell monolayer. After the 2 hour incubation, the virus-antibody mixture was aspirated, replaced by a methylcellulose overlay, and incubated for 6 to 7 days at 36°C at 5% CO<sub>2</sub> when viral plaques are easily visualised. The cell-virus monolayer was fixed overnight, air dried and plaques were counted using a plaque reader. The lower limit of detection was 5 pfu/ml. Samples with no visual plaques were assigned a value of 2.5 PFU/mL for statistical analysis.

**Nebuliser set-up for cotton rat study.** Akita<sup>2</sup> Apixneb nebulizer (Vectura GmbH, Germany) was used for whole body exposure. Air flow was supplied by an Aridyne 2000 compressor with a flow meter set at 15 L/min. Cotton rats were housed 2 per cage with 3 cages linked together in series (a total of 6 cotton rats were treated per run) (Figure S2). They were exposed to an aerosol from a single nebulizer containing 9 mL of formulation buffer or ALX-0171 at 5 mg/mL, 15 mg/mL or 50 mg/mL. Aerosol was collected from the exhaust using an all glass impinger to calculate estimated delivered dose. The nebulizer was allowed to run for 10-13 minutes until the nebulizer reservoir ran dry.

**Determination of viral titers in lung lavage and nasal wash in cotton rats.** Viral titers were determined by a plaque assay. These were performed using 24-well tissue cultures plates containing nearly confluent monolayers (seeded at 2x10<sup>5</sup> cells/well) of HEp-2 cells prepared in 10% Foetal bovine serum (FBS) 24 h prior to the start of the assay. Dilutions (serial log<sub>10</sub>) of the nasal or lung lavage fluids were then made and 0.2 mL of each sample was added in duplicate to the wells. Adsorption was allowed for 90

min in a 36°C, 5% CO<sub>2</sub> incubator with occasional gentle agitation before removal of the inoculum and overlay of the monolayers with 0.75% methylcellulose in 2% FBS-MEM containing antibiotics, vitamins and other nutrients (100 units penicillin, 100 µg/mL streptomycin, 0.25 µg/mL Fungizone and 2 mM glutamine from GIBCO). Tissue culture and positive virus controls were included in each assay. After culturing for 6 ± 1 days in a 36°C, 5% CO<sub>2</sub> incubator, the plates were stained with 0.01% crystal violet/10% formalin solution (1.5 mL/well) and allowed to sit for 24-48 h at RT before being rinsed. All wells containing between ~20 and ~100 plaques were enumerated, averaged and the virus titers calculated as log<sub>10</sub> total PFU for nasal wash fluid or log<sub>10</sub> PFU/g of tissue for lungs. As the lung titers are calculated as “per g of lung tissue” there is a range of values for both minimum detection levels and the assigned value for no plaques as slightly different amounts of lung tissue is removed from each animal. Minimum detection (i.e., only 1 PFU in either duplicate well) is therefore estimated to be in the range of 1.03-1.21 PFU/g lung. For statistical analysis, no detection (0 plaques) in the lung tissue was assigned a value that was the mean of minimal detection values per experiment. For the nose, 0 plaques were assigned a value of 0.40 log<sub>10</sub> total PFU for nose.

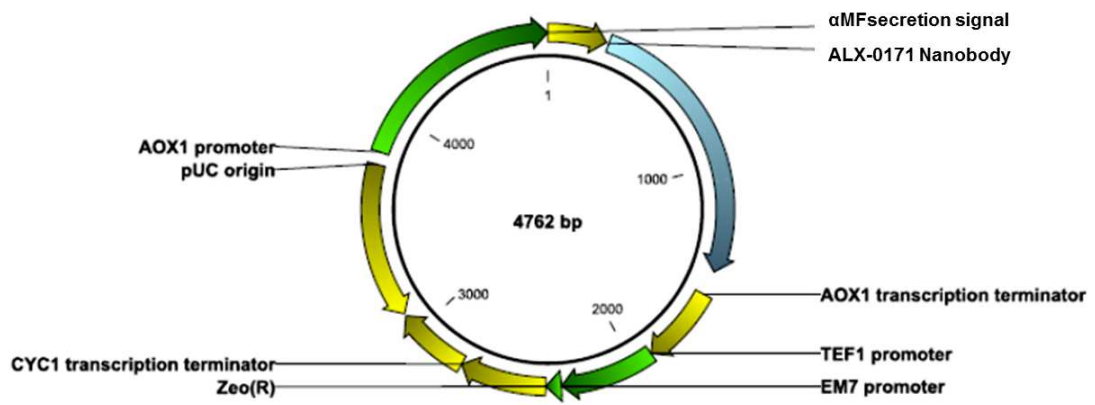

Figure S1. Map of the expression construct used for transformation of *Pichia pastoris* X 33.

**Table S1. RSV strains by year of isolation** (selected from the RSV bank at Baylor College of Medicine, Houston Texas) [2]

| RSV-A Virus name | Genotype classification | Month/Year of Isolation | Age of patient at time of Collection |
|------------------|-------------------------|-------------------------|--------------------------------------|
| A-TX-Tracy       | GA1                     | Jan-89                  |                                      |
| A-TX-66125       | GA5                     | Mar-94                  | 6 mos.                               |
| A-TX-37425       | GA3/GA6/SAA1            | Dec-87                  |                                      |
| A-TX-79312       | GA2                     | Jan-05                  | 8 mos                                |
| A-TX-79258       | GA2                     | Dec-04                  | 8 mos.                               |
| A-TX-79218       | GA5                     | Nov-04                  | 1 yr.                                |
| A-TX-79257       | GA5                     | Dec-04                  | 6 mos.                               |
| A-TX-79321       | GA2                     | Jan-05                  | 2 mos                                |
| A-TX-79228       | GA5                     | Nov-04                  | 9 mos                                |
| A-TX-79309       | GA2                     | Jan-05                  | 9 mos.                               |
| A-TX-79248       | GA5                     | Nov-04                  | 2 mos.                               |
| A-TX-79219       | GA5                     | Nov-04                  | 1 yr.                                |
| A-TX-79308       | GA2                     | Jan-05                  | 6 mos.                               |
| A-TX-50437       | GA5                     | Jan-91                  | 59 yrs.                              |
| A-TX-68357       | GA5                     | Dec-94                  | 2 mos.                               |
| A-TX-79365       | GA5                     | Feb-05                  | 4 mos.                               |
| A-TX-79306       | GA5                     | Jan-05                  | 7 mos.                               |
| A-TX-79254       | GA5                     | Dec-04                  | 4 mos.                               |
| A-TX-79240       | GA5                     | Nov-04                  | 9 mos.                               |
| A-TX-61245       | GA5                     | Feb-93                  | 7 mos.                               |
| A-TX-79299       | GA2                     | Jan-05                  | 5 mos.                               |
| A-TX-79326       | GA5                     | Jan-05                  | 2 mos.                               |
| A-TX-50106       | GA5                     | Jan-91                  | 1 yr.                                |
| A-TX-79216       | GA5                     | Nov-04                  | 10 mos.                              |
| A-TX-79285       | GA5                     | Dec-04                  | 3 mos.                               |
| A-TX-79286       | GA5                     | Dec-04                  | 1 yr.                                |
| A-TX-79230       | GA5                     | Nov-04                  | 10 mos.                              |
| A-TX-79303       | GA7                     | Jan-05                  | 4 mos.                               |
| A-TX-79310       | GA5                     | Jan-05                  | 8 mos.                               |
| A-TX-79334       | GA2                     | Jan-05                  | 5 mos.                               |
| A-TX-79223       | GA2                     | Nov-04                  | 1 yr.                                |
| A-TX-79256       | GA2                     | Dec-04                  | 1 mo.                                |

| RSV B Virus name | Genotype classification | Month/Year of Isolation | Age at time of Collection |
|------------------|-------------------------|-------------------------|---------------------------|
| B-CH-18537       | GB1                     | 1962                    |                           |
| B-TX-64817       | GB1/GB2                 | Dec-93                  | 4 mos.                    |
| B-TX-65859       | GB3                     | Feb-94                  | 2 mos.                    |
| B-TX-61326       | GB4                     | Feb-93                  | 20 yrs.                   |
| B-TX-79233       | BA                      | Nov-04                  | 8 mos.                    |
| B-TX-60687       | GB3                     | Jan-93                  | 8 mos.                    |
| B-TX-79247       | BA                      | Nov-04                  | 1 mo.                     |
| B-TX-79226       | BA                      | Nov-04                  | 2 mos.                    |
| B-TX-65449       | GB4                     | Jan-94                  | 7 mos.                    |
| B-TX-60911       | GB4                     | Jan-93                  | 19 days                   |
| B-TX-60823       | GB1/GB2                 | Jan-93                  | 9 mos.                    |
| B-TX-79307       | BA                      | Jan-05                  | 2 mos.                    |
| B-TX-79325       | BA                      | Jan-05                  | 2 mos.                    |
| B-TX-60462       | GB4                     | Jan-93                  | 3 mos.                    |
| B-TX-61699       | GB4                     | Mar-93                  | 67 yrs.                   |
| B-TX-61500       | GB3                     | Feb-93                  | 8 yrs/                    |
| B-TX-60188       | GB4                     | Dec-92                  | 1 yr.                     |
| B-TX-79362       | BA                      | Feb-05                  | 4 mos.                    |
| B-TX-57097       | GB1                     | Dec-91                  | 5 mos                     |
| B-TX-61501       | GB3                     | Feb-93                  | 9 mos.                    |
| B-TX-60567       | GB3                     | Jan-93                  | 10 days                   |
| B-TX-61138       | GB1                     | Feb-93                  | 1 mo.                     |
| B-TX-60586       | GB4                     | Jan-93                  | 51 yrs.                   |
| B-TX-61406       | GB4                     | Feb-93                  | 5 mos.                    |
| B-TX-79222       | BA                      | Nov-04                  | 1 yrs.                    |
| B-TX-61512       | GB4                     | Feb-93                  | 57 yrs.                   |
| B-TX-61077       | GB4                     | Feb-93                  | 3 mos.                    |
| B-TX-61736       | GB4                     | Mar-93                  | 32 yrs.                   |
| B-TX-61735       | GB4                     | Mar-93                  | 28 yrs.                   |

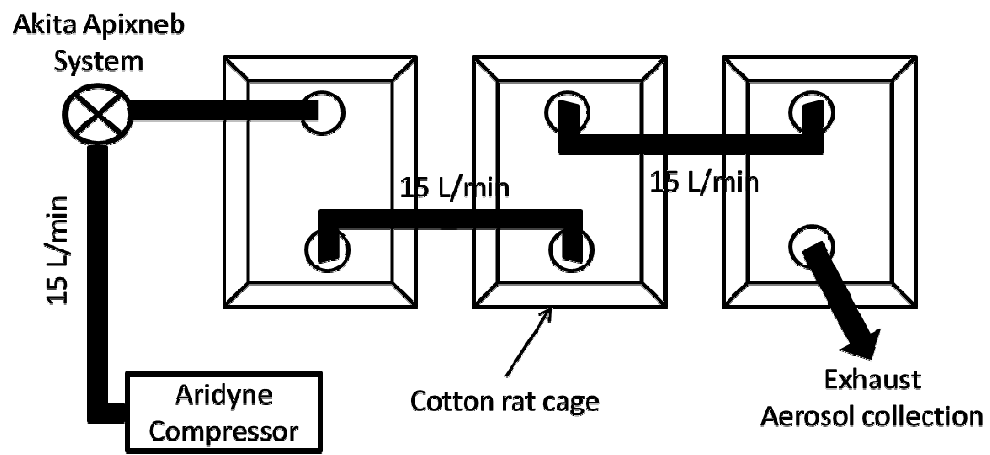

Figure S2. Cage setup for aerosol treatment



**Table S2. Stability data of ALX-0171 at long-term storage condition (5°C ± 3°C) before and after nebulisation using an Akita<sup>2</sup> Apixneb nebuliser.**

| Method                                                    | Pre/post<br>Nebulisation | Time points (months) |                 |                 |                 |                 |
|-----------------------------------------------------------|--------------------------|----------------------|-----------------|-----------------|-----------------|-----------------|
|                                                           |                          | 0                    | 6               | 12              | 24              | 36              |
| Content [mg/mL]<br>(OD <sub>340</sub> )                   | Pre                      | 50.5<br>(0.012)      | 52.2<br>(0.007) | 46.6<br>(0.001) | 47.7<br>(0.005) | 47.8<br>(0.000) |
|                                                           | Post                     | 54.5<br>(0.035)      | 45.5<br>(0.021) | 45.0<br>(0.001) | 48.1<br>(0.004) | 46.7<br>(0.000) |
| SE-HPLC<br>[% main peak]/<br>[% HMW]                      | Pre                      | 99 / 1               | 99 / 1          | 99 / 0          | 100 / 0         | 99 / 0          |
|                                                           | Post                     | 98 / 2               | 98 / 1          | 98 / 1          | 99 / 1          | 97 / 2          |
| Potency ELISA<br>[% compared<br>to reference<br>standard] | Pre                      | 105                  | 95              | 106             | 103             | 106             |
|                                                           | Post                     | 95                   | 121             | 116             | 97              | 111             |

## REFERENCES

1. Reed LJ, Muench H. A simple method of estimating fifty percent endpoints. The American Journal of Hygiene **1938**; 27:493-7.
2. Tapia LI, Shaw CA, Aideyan LO, et al. Gene sequence variability of the three surface proteins of human respiratory syncytial virus (HRSV) in Texas. PLoS One **2014**; 9:e90786.
